# Supplementary material for: Type I Interferon: Potential Therapeutic Target for Psoriasis?
Source: PLoS One. 2008 Jul 16;3(7):e2737. doi: 10.1371/journal.pone.0002737 (PMC2481274; doi:10.1371/journal.pone.0002737)
Supplement: Table S1 — Fold change (fc; log2 transformed) and q Value (calculated by FDR) of the top 100 probe sets up-regulated in lesional skin compared with nonlesional skin in psoriasis. Also listed are the log2 transformed fold change and q values of these genes when comparing nonlesional skin with normal skin from healthy donors. Type I IFN-inducible genes are designated by the IFNI column. The table is available at: http://www.medimmune.com/translationalscience/data/psoriasis2007/. (0.04 MB DOC) [file pone.0002737.s001.xls]

## Sheet: LS vs NS (all genes)
				Lesional vs Non-lesional			Non-lesional vs Normal		IFNI
Probe ID	Unigene ID	Gene Title	Gene Symbol	p value	log2 fc	q value	log2 fc	q value
232170_at	Hs.442337	S100 calcium binding protein A7-like 1	S100A7L1	6.89265e-26	8.21937	2.16345e-22	0.499338	0.137744
211906_s_at	Hs.123035	serpin peptidase inhibitor, clade B (ovalbumin), member 4	SERPINB4	7.67854e-22	8.14285	2.45922e-19	1.83904	0.040744
207356_at	Hs.105924	defensin, beta 4	DEFB4	1.87452e-22	7.3414	8.07375e-20	2.51986	0.000785089
205513_at	Hs.2012	transcobalamin I (vitamin B12 binding protein, R binder family)	TCN1	5.88195e-19	7.19895	5.92493e-17	-0.404179	0.204721
41469_at	Hs.112341	peptidase inhibitor 3, skin-derived (SKALP)	PI3	7.03806e-27	7.1448	4.39548e-23	-0.0343813	0.37495
203691_at	Hs.112341	peptidase inhibitor 3, skin-derived (SKALP)	PI3	1.2348e-28	7.00651	1.54234e-24	-0.0344371	0.372472
210413_x_at	Hs.123035	serpin peptidase inhibitor, clade B (ovalbumin), member 4	SERPINB4	1.38811e-25	6.97357	2.88972e-22	0.783634	0.115266
205863_at	Hs.19413	S100 calcium binding protein A12 (calgranulin C)	S100A12	1.19023e-19	6.95987	1.68939e-17	-0.206465	0.0939557
220664_at	Hs.592363	small proline-rich protein 2C	SPRR2C	1.55945e-23	6.79686	1.08214e-20	0.374888	0.0493703
209719_x_at	Hs.227948	serpin peptidase inhibitor, clade B (ovalbumin), member 3	SERPINB3	1.91922e-24	6.34569	1.99769e-21	0.66266	0.129598
209720_s_at	Hs.227948	serpin peptidase inhibitor, clade B (ovalbumin), member 3	SERPINB3	7.58642e-26	6.2377	2.16345e-22	0.526425	0.161117
203535_at	Hs.112405	S100 calcium binding protein A9 (calgranulin B)	S100A9	8.66029e-26	6.11402	2.16345e-22	1.38644	0.0514842
202018_s_at	Hs.529517	lactotransferrin	LTF	8.25355e-19	5.85493	7.93014e-17	-1.57761	0.0278885
212531_at	Hs.204238	lipocalin 2 (oncogene 24p3)	LCN2	8.09289e-22	5.75037	2.52713e-19	-0.157755	0.307465
206561_s_at	Hs.116724	aldo-keto reductase family 1, member B10 (aldose reductase)	AKR1B10	1.97055e-22	5.45012	8.20444e-20	0.0123136	0.382481
208539_x_at	Hs.568239	small proline-rich protein 2B	SPRR2B	7.43583e-21	5.38144	1.68869e-18	0.967435	0.0561565
217388_s_at	Hs.470126	kynureninase (L-kynurenine hydrolase)	KYNU	3.65587e-25	5.35365	5.07378e-22	-0.654486	0.0407803
207367_at	Hs.147111	ATPase, H+/K+ transporting, nongastric, alpha polypeptide	ATP12A	9.67704e-17	5.34929	4.37942e-15	-0.461193	0.0771875
239430_at	Hs.546554	insulin growth factor-like family member 1	IGFL1	1.87654e-21	5.16524	5.32709e-19	0.312416	0.0826705
219554_at	Hs.459284	Rh family, C glycoprotein	RHCG	2.82853e-19	5.14024	3.2713e-17	-1.11656	0.0164112
213060_s_at	Hs.514840	chitinase 3-like 2	CHI3L2	5.57077e-22	5.12439	1.93284e-19	-0.787465	0.0785683
204733_at	Hs.79361	kallikrein 6 (neurosin, zyme)	KLK6	1.40921e-13	4.85293	1.92581e-12	0.265892	0.235716
220322_at	Hs.211238	interleukin 1 family, member 9	IL1F9	8.00816e-23	4.83299	4.16778e-20	0.639046	0.124836
202859_x_at	Hs.624	interleukin 8	IL8	2.14237e-11	4.66507	1.48995e-10	-1.20329	0.0347436
224328_s_at	Hs.244349	late cornified envelope 3D	LCE3D	1.88967e-15	4.63043	5.2104e-14	1.98607	0.00236284
219403_s_at	Hs.44227	heparanase	HPSE	2.8549e-25	4.59811	4.45743e-22	0.225921	0.235887	X
209800_at	---	keratin 16 (focal non-epidermolytic palmoplantar keratoderma)	KRT16	1.22759e-20	4.57447	2.48404e-18	0.167256	0.317939
227735_s_at	Hs.298713	chromosome 10 open reading frame 99	C10orf99	3.57939e-14	4.48738	5.88273e-13	2.22357	0.000337698
207602_at	Hs.132195	transmembrane protease, serine 11D	TMPRSS11D	1.69945e-14	4.47691	3.16824e-13	0.0151734	0.230452
210663_s_at	Hs.470126	kynureninase (L-kynurenine hydrolase)	KYNU	2.52319e-18	4.40048	2.0074e-16	-0.0246681	0.354789
204580_at	Hs.1695	matrix metallopeptidase 12 (macrophage elastase)	MMP12	2.30839e-15	4.38605	6.20068e-14	-0.229617	0.266247
227736_at	Hs.298713	chromosome 10 open reading frame 99	C10orf99	6.15981e-14	4.29287	9.40583e-13	2.37078	0.000473564
232074_at	Hs.332878	protease, serine 27	PRSS27	2.3862e-17	4.20708	1.39276e-15	-0.0212074	0.26708
204972_at	Hs.414332	2'-5'-oligoadenylate synthetase 2, 69/71kDa	OAS2	3.52481e-15	4.09841	8.56557e-14	0.0960158	0.288963	X
219795_at	Hs.522109	solute carrier family 6 (amino acid transporter), member 14	SLC6A14	5.42826e-16	4.09569	1.82264e-14	-0.831919	0.0540375
231033_at	Hs.557559	Full length insert cDNA clone YI40A07	---	2.8824e-14	4.03108	4.8917e-13	-0.66381	0.0283279
205660_at	Hs.118633	2'-5'-oligoadenylate synthetase-like	OASL	9.22074e-14	4.03012	1.34391e-12	0.028733	0.20341	X
227609_at	Hs.546467	epithelial stromal interaction 1 (breast)	EPSTI1	3.10125e-16	4.00171	1.14267e-14	-0.254447	0.107963	X
205783_at	Hs.165296	kallikrein 13	KLK13	6.1486e-17	3.97272	3.05975e-15	0.540117	0.078444
227458_at	---	---	---	3.94208e-15	3.85856	9.30794e-14	-0.590906	0.0544941	X
1555756_a_at	Hs.143929	C-type lectin domain family 7, member A	CLEC7A	2.42061e-21	3.85834	6.57281e-19	0.601276	0.0800111
219352_at	Hs.529317	hect domain and RLD 6	HERC6	1.54729e-17	3.84211	9.48812e-16	-0.460093	0.0481006	X
203915_at	Hs.77367	chemokine (C-X-C motif) ligand 9	CXCL9	2.48516e-12	3.84027	2.26909e-11	0.349022	0.120737
204858_s_at	Hs.592212	endothelial cell growth factor 1 (platelet-derived)	ECGF1	3.98408e-16	3.81521	1.40973e-14	-0.711062	0.00553419
216834_at	Hs.75256	regulator of G-protein signalling 1	RGS1	1.9748e-19	3.80886	2.46664e-17	-5.26919	7.60564e-07	X
206134_at	Hs.521459	ADAM-like, decysin 1	ADAMDEC1	1.48897e-13	3.78238	2.02154e-12	0.119963	0.108157
218810_at	Hs.471918	zinc finger CCCH-type containing 12A	ZC3H12A	3.21812e-18	3.74745	2.45099e-16	-1.05613	0.0243135
232082_x_at	Hs.139322	small proline-rich protein 3	SPRR3	8.42578e-18	3.71904	5.53911e-16	1.01394	0.0568804
204533_at	Hs.632586	chemokine (C-X-C motif) ligand 10	CXCL10	2.34795e-13	3.69652	2.97437e-12	0.338025	0.13024	X
205476_at	Hs.75498	chemokine (C-C motif) ligand 20	CCL20	2.43652e-15	3.64396	6.43417e-14	-1.90836	0.0219703
217315_s_at	Hs.165296	kallikrein 13	KLK13	6.30312e-13	3.5979	6.94879e-12	0.137354	0.188884
226702_at	Hs.7155	hypothetical protein LOC129607	LOC129607	3.09382e-18	3.57236	2.37078e-16	-0.156124	0.264998	X
218960_at	Hs.161985	transmembrane protease, serine 4	TMPRSS4	2.73703e-20	3.51401	4.95467e-18	-0.430782	0.130096
223278_at	Hs.591234	gap junction protein, beta 2, 26kDa (connexin 26)	GJB2	3.73877e-20	3.50616	6.33791e-18	-0.224196	0.261269
224209_s_at	Hs.494163	guanine deaminase	GDA	5.27529e-12	3.48068	4.38109e-11	1.64208	0.00156559
205916_at	Hs.112408	S100 calcium binding protein A7 (psoriasin 1)	S100A7	1.40781e-12	3.46353	1.39559e-11	2.0931	0.00545225
243754_at	Hs.633719	Transcribed locus	---	5.11065e-13	3.44841	5.78216e-12	-0.0650241	0.148765
209772_s_at	Hs.632285	CD24 molecule	CD24	7.33552e-18	3.43828	4.89974e-16	0.196429	0.261384
202917_s_at	Hs.416073	S100 calcium binding protein A8 (calgranulin A)	S100A8	1.13415e-15	3.4134	3.34898e-14	1.54028	0.0232538
242625_at	Hs.17518	radical S-adenosyl methionine domain containing 2	RSAD2	1.18622e-13	3.40256	1.65363e-12	-0.0697437	0.313091	X
211788_s_at	Hs.170835	three prime repair exonuclease 2	TREX2	4.16678e-13	3.3936	4.8915e-12	0.0559971	0.228963
211362_s_at	Hs.241407	serpin peptidase inhibitor, clade B (ovalbumin), member 13	SERPINB13	1.80685e-16	3.39198	7.21044e-15	0.468667	0.100399
214580_x_at	---	keratin 6A	KRT6A	6.37987e-17	3.37996	3.16224e-15	0.225698	0.274609
204385_at	Hs.470126	kynureninase (L-kynurenine hydrolase)	KYNU	3.90635e-16	3.37654	1.38616e-14	-0.0425897	0.261149
214490_at	Hs.101674	arylsulfatase F	ARSF	1.82366e-19	3.36725	2.37277e-17	-0.534547	0.0215705
216258_s_at	Hs.241407	serpin peptidase inhibitor, clade B (ovalbumin), member 13	SERPINB13	2.62843e-17	3.32147	1.506e-15	0.706432	0.069864
242271_at	Hs.164073	solute carrier family 26, member 9	SLC26A9	1.66402e-19	3.31075	2.21114e-17	0.00383781	0.38493
206628_at	Hs.1964	solute carrier family 5 (sodium/glucose cotransporter), member 1	SLC5A1	7.3832e-19	3.26603	7.20474e-17	-0.164372	0.256391
210138_at	Hs.368733	regulator of G-protein signalling 20	RGS20	3.70452e-16	3.24667	1.3269e-14	0.526811	0.086326
213797_at	Hs.17518	radical S-adenosyl methionine domain containing 2	RSAD2	5.46947e-11	3.24303	3.36339e-10	0.00364027	0.362089	X
202086_at	Hs.517307	myxovirus (influenza virus) resistance 1	MX1	1.92225e-15	3.23542	5.27695e-14	0.0504598	0.334534	X
220658_s_at	Hs.434269	aryl hydrocarbon receptor nuclear translocator-like 2	ARNTL2	5.87045e-20	3.22944	9.28171e-18	0.291426	0.163565
205552_s_at	Hs.524760	2',5'-oligoadenylate synthetase 1, 40/46kDa	OAS1	7.57668e-16	3.22215	2.41163e-14	0.327641	0.136694	X
210797_s_at	Hs.118633	2'-5'-oligoadenylate synthetase-like	OASL	3.23164e-10	3.21574	1.62894e-09	0.00477307	0.349395	X
209125_at	---	keratin 6A	KRT6A	1.27647e-16	3.20896	5.42309e-15	0.444259	0.162166
204439_at	Hs.389724	interferon-induced protein 44-like	IFI44L	2.77296e-14	3.20527	4.73168e-13	0.120124	0.300726	X
214549_x_at	Hs.46320	small proline-rich protein 1A	SPRR1A	3.45889e-13	3.20387	4.1783e-12	0.880013	0.0579272
210164_at	Hs.1051	granzyme B	GZMB	4.49765e-14	3.20107	7.15487e-13	-0.378911	0.0323855
202411_at	Hs.532634	interferon, alpha-inducible protein 27	IFI27	4.08413e-13	3.16525	4.80804e-12	-0.153656	0.268775	X
221698_s_at	Hs.143929	C-type lectin domain family 7, member A	CLEC7A	3.35143e-20	3.1635	5.81408e-18	0.278706	0.192143
202869_at	Hs.524760	2',5'-oligoadenylate synthetase 1, 40/46kDa	OAS1	7.81168e-16	3.14967	2.47019e-14	0.248359	0.214032	X
209773_s_at	Hs.226390	ribonucleotide reductase M2 polypeptide	RRM2	5.01858e-13	3.13682	5.70903e-12	0.922373	0.0664222
208650_s_at	Hs.375108	CD24 molecule	CD24	1.55892e-20	3.12193	3.04247e-18	0.112094	0.30461
217272_s_at	Hs.241407	serpin peptidase inhibitor, clade B (ovalbumin), member 13	SERPINB13	3.00793e-23	3.09219	1.87854e-20	0.679301	0.0760402
228648_at	Hs.515079	leucine-rich alpha-2-glycoprotein 1	LRG1	1.90211e-15	3.08868	5.23315e-14	-0.614998	0.0959336
205483_s_at	Hs.458485	ISG15 ubiquitin-like modifier	ISG15	2.7698e-14	3.08762	4.73168e-13	-0.27344	0.110127	X
32128_at	Hs.143961	chemokine (C-C motif) ligand 18	CCL18	8.19153e-09	3.07091	2.87408e-08	-0.290423	0.238831
206008_at	Hs.508950	transglutaminase 1	TGM1	1.70441e-19	3.06848	2.24095e-17	0.101674	0.297612
209924_at	Hs.143961	chemokine (C-C motif) ligand 18	CCL18	3.58557e-09	3.05148	1.3857e-08	-0.0597671	0.361122
220249_at	Hs.28673	hyaluronoglucosaminidase 4	HYAL4	1.06656e-16	3.03413	4.72729e-15	0.141183	0.104256
226698_at	Hs.591257	FCH and double SH3 domains 1	FCHSD1	9.34122e-20	3.03139	1.34112e-17	0.808791	0.000199955
241994_at	Hs.250	xanthine dehydrogenase	XDH	5.96369e-16	3.02985	1.98112e-14	0.216832	0.249407
211361_s_at	Hs.241407	serpin peptidase inhibitor, clade B (ovalbumin), member 13	SERPINB13	7.42415e-25	3.01933	9.27321e-22	0.32203	0.16226
205844_at	Hs.12114	vanin 1	VNN1	7.55609e-14	3.01114	1.12895e-12	0.0846266	0.270061
221107_at	Hs.272278	cholinergic receptor, nicotinic, alpha 9	CHRNA9	5.31268e-17	3.00789	2.75347e-15	0.261659	0.0384708
1554406_a_at	Hs.143929	C-type lectin domain family 7, member A	CLEC7A	1.33668e-22	2.99948	5.96283e-20	0.254616	0.128815
220528_at	Hs.183656	vanin 3	VNN3	2.69441e-12	2.99302	2.43699e-11	0.00560743	0.300782
209969_s_at	Hs.565365	signal transducer and activator of transcription 1, 91kDa	STAT1	8.40173e-19	2.99282	7.9502e-17	0.198831	0.200717	X
215223_s_at	Hs.487046	superoxide dismutase 2, mitochondrial	SOD2	2.62988e-19	2.99115	3.12846e-17	-1.08907	0.0400687
