# Supplementary material for: Type I Interferon: Potential Therapeutic Target for Psoriasis?
Source: PLoS One. 2008 Jul 16;3(7):e2737. doi: 10.1371/journal.pone.0002737 (PMC2481274; doi:10.1371/journal.pone.0002737)
Supplement: Table S3 — Fold change (fc; log2 transformed) and q Value (calculated by FDR) of the top 50 probe sets down-regulated in nonlesional skin compared with skin from healthy donors. Also listed are the log2 transformed fold change and q values of these genes when comparing nonlesional skin with lesional skin. All data was GC-RMA normalized. The table is available at: http://www.medimmune.com/translationalscience/data/psoriasis2007/. (0.03 MB XLS) [file pone.0002737.s003.xls]

## Sheet: Sheet1
				Nonlesional vs Normal			Lesional vs Nonlesional
Probe ID	Unigene ID	Gene Title	Gene Symbol	P value	log2 fc	q Value	log2 fc	q Value
216834_at	Hs.75256	regulator of G-protein signalling 1	RGS1	1.43418e-10	-5.26919	7.60564e-07	3.80886	2.46664e-17
230746_s_at	Hs.25590	Stanniocalcin 1	STC1	2.15487e-07	-3.71617	2.89098e-05	0.239282	0.113798
202988_s_at	Hs.75256	regulator of G-protein signalling 1	RGS1	2.70152e-08	-3.69396	8.46691e-06	1.94422	9.57043e-10
202672_s_at	Hs.460	activating transcription factor 3	ATF3	2.4819e-08	-3.43192	8.35668e-06	-0.61384	0.00413112
227697_at	Hs.527973	suppressor of cytokine signaling 3	SOCS3	1.00147e-06	-3.42501	7.31082e-05	1.8188	4.55491e-10
204595_s_at	Hs.25590	stanniocalcin 1	STC1	4.55291e-06	-3.40642	0.000183959	0.0638258	0.166972
202499_s_at	Hs.419240	solute carrier family 2 (facilitated glucose transporter), member 3	SLC2A3	1.55142e-08	-3.3916	6.73475e-06	0.620201	0.00296761
243296_at	Hs.592288	Pre-B-cell colony enhancing factor 1	PBEF1	2.44578e-08	-3.38867	8.35668e-06	1.78127	7.61507e-13
202768_at	Hs.590958	FBJ murine osteosarcoma viral oncogene homolog B	FOSB	3.03599e-05	-3.33477	0.000638897	0.0387033	0.215113
210387_at	Hs.591809	histone 1, H2bg	HIST1H2BG	4.23137e-06	-3.3093	0.000176508	0.384169	0.0291727
1553946_at	Hs.350570	dermcidin	DCD	0.00185153	-3.2675	0.00998069	-1.41271	0.0757739
206378_at	Hs.46452	secretoglobin, family 2A, member 2	SCGB2A2	0.000589365	-3.21914	0.00462479	-1.55346	0.0497756
206509_at	Hs.99949	prolactin-induced protein	PIP	0.000701866	-3.19837	0.00521045	-1.64889	0.0364474
201465_s_at	Hs.525704	v-jun sarcoma virus 17 oncogene homolog (avian)	JUN	2.28385e-08	-2.97386	8.07433e-06	-0.346421	0.00730634
206799_at	Hs.204096	secretoglobin, family 1D, member 2	SCGB1D2	0.00017263	-2.95007	0.00198786	-2.08476	0.00907118
204622_x_at	Hs.563344	nuclear receptor subfamily 4, group A, member 2	NR4A2	1.65095e-08	-2.94266	6.73475e-06	-0.136793	0.128597
201466_s_at	Hs.525704	v-jun sarcoma virus 17 oncogene homolog (avian)	JUN	7.44227e-10	-2.9304	1.26312e-06	-0.146424	0.116649
204621_s_at	Hs.563344	nuclear receptor subfamily 4, group A, member 2	NR4A2	8.29833e-08	-2.92944	1.70901e-05	-0.167334	0.104104
217028_at	Hs.421986	chemokine (C-X-C motif) receptor 4	CXCR4	7.74103e-10	-2.92135	1.26312e-06	2.84826	2.17687e-13
209189_at	Hs.25647	v-fos FBJ murine osteosarcoma viral oncogene homolog	FOS	1.0978e-05	-2.84909	0.00032343	-1.61338	6.02665e-05
205239_at	Hs.632601	amphiregulin (schwannoma-derived growth factor)	AREG	2.68387e-06	-2.73551	0.000135692	2.1488	7.25828e-14
201693_s_at	Hs.326035	early growth response 1	EGR1	6.22152e-07	-2.67272	5.45346e-05	-0.071665	0.18979
205207_at	Hs.512234	interleukin 6 (interferon, beta 2)	IL6	0.000610985	-2.65377	0.00473357	0.198604	0.0153625
201289_at	Hs.8867	cysteine-rich, angiogenic inducer, 61	CYR61	2.73194e-08	-2.64737	8.46691e-06	-0.585475	0.0136251
216248_s_at	Hs.563344	nuclear receptor subfamily 4, group A, member 2	NR4A2	5.99046e-08	-2.61412	1.42603e-05	-0.307974	0.0336707
235419_at	Hs.11169	ERBB receptor feedback inhibitor 1	ERRFI1	8.72571e-07	-2.6003	6.72577e-05	0.108608	0.149956
202340_x_at	Hs.524430	nuclear receptor subfamily 4, group A, member 1	NR4A1	5.60756e-09	-2.57944	4.70314e-06	-0.24829	0.0319794
213281_at	Hs.525704	V-jun sarcoma virus 17 oncogene homolog (avian)	JUN	4.2088e-10	-2.56916	9.9199e-07	0.113412	0.132541
211430_s_at	Hs.510635	immunoglobulin heavy locus	IGH@	0.000567756	-2.56809	0.00450561	0.27745	0.152783
201531_at	Hs.534052	zinc finger protein 36, C3H type, homolog (mouse)	ZFP36	2.04011e-07	-2.56509	2.87185e-05	0.548054	3.94071e-05
222088_s_at	Hs.419240	solute carrier family 2 (facilitated glucose transporter), member 3	SLC2A3	2.76616e-06	-2.54992	0.000137183	0.141163	0.0581422
207574_s_at	Hs.110571	growth arrest and DNA-damage-inducible, beta	GADD45B	9.54074e-08	-2.54647	1.82327e-05	0.186406	0.0507753
233223_at	Hs.37982	Neural precursor cell expressed, developmentally down-regulated 9	NEDD9	3.11636e-08	-2.52026	8.95705e-06	-0.307514	0.0343008
236571_at	Hs.419240	Solute carrier family 2 (facilitated glucose transporter), member 3	SLC2A3	1.93539e-07	-2.50401	2.79489e-05	0.0461603	0.168822
202497_x_at	Hs.419240	solute carrier family 2 (facilitated glucose transporter), member 3	SLC2A3	6.05002e-06	-2.46128	0.000219003	0.365425	0.0172971
201464_x_at	Hs.525704	v-jun sarcoma virus 17 oncogene homolog (avian)	JUN	1.25224e-09	-2.45743	1.66019e-06	-0.165864	0.0647589
202912_at	Hs.441047	adrenomedullin	ADM	2.91838e-08	-2.45695	8.59805e-06	0.223687	0.0932261
203980_at	Hs.391561	fatty acid binding protein 4, adipocyte	FABP4	0.00149054	-2.44486	0.0087222	-1.58734	0.0205442
204597_x_at	Hs.25590	stanniocalcin 1	STC1	3.10112e-05	-2.44197	0.000644618	-0.0194568	0.16171
210764_s_at	Hs.8867	cysteine-rich, angiogenic inducer, 61	CYR61	1.29471e-06	-2.4268	8.52917e-05	-0.745592	0.00806129
221031_s_at	Hs.23388	apolipoprotein L domain containing 1	APOLD1	1.63368e-06	-2.38721	9.90125e-05	-0.380307	0.028846
209304_x_at	Hs.110571	growth arrest and DNA-damage-inducible, beta	GADD45B	1.93683e-07	-2.36872	2.79489e-05	0.189372	0.0171678
236495_at	Hs.592288	Pre-B-cell colony enhancing factor 1	PBEF1	1.48796e-05	-2.35544	0.000397522	0.18487	0.010166
218541_s_at	Hs.591849	chromosome 8 open reading frame 4	C8orf4	1.6263e-08	-2.34147	6.73475e-06	0.272432	0.046497
201169_s_at	Hs.171825	basic helix-loop-helix domain containing, class B, 2	BHLHB2	1.04641e-05	-2.31742	0.000312633	0.841262	0.000676787
217059_at	Hs.631946	mucin 7, secreted	MUC7	0.000248011	-2.30202	0.0025613	-1.14855	0.00207555
222162_s_at	Hs.534115	ADAM metallopeptidase with thrombospondin type 1 motif, 1	ADAMTS1	4.07193e-08	-2.26557	1.09336e-05	0.0104482	0.22092
233011_at	Hs.494173	Annexin A1	ANXA1	0.000833842	-2.25642	0.00586436	-1.16411	8.77481e-05
209305_s_at	Hs.110571	growth arrest and DNA-damage-inducible, beta	GADD45B	7.55073e-06	-2.24572	0.000253834	0.201641	0.0901493
203574_at	Hs.79334	nuclear factor, interleukin 3 regulated	NFIL3	1.24318e-07	-2.22076	2.16155e-05	0.296228	0.013495
